# Supplementary material for: Chromosome Architecture and Gene Content of the Emergent Pathogen Acinetobacter haemolyticus
Source: PubMed Central journal article supplement (PMC7326120; doi:10.3389/fmicb.2020.00926), 2020-05-25
Supplement: Data_Sheet_7.pdf [file Data_Sheet_7.pdf]

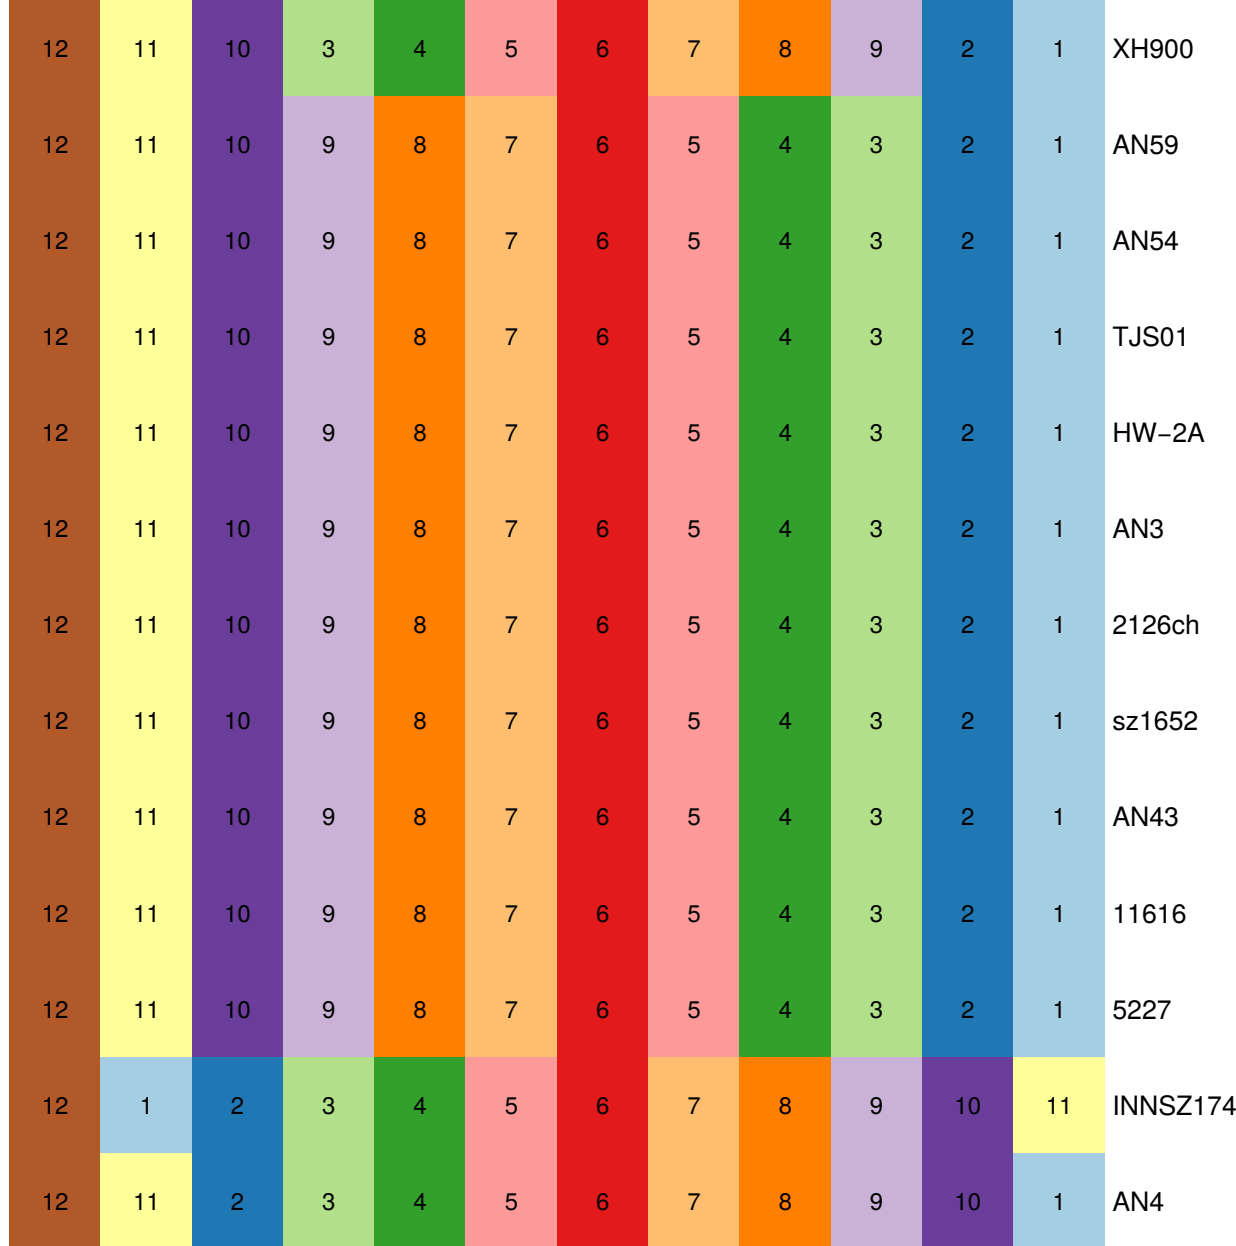

**Supplementary Figure 7. Spot order in representative strains.**

Each spot is represented by a different color.
