# Supplementary material for: Chromosome Architecture and Gene Content of the Emergent Pathogen Acinetobacter haemolyticus
Source: PubMed Central journal article supplement (PMC7326120; doi:10.3389/fmicb.2020.00926), 2020-05-25
Supplement: Data_Sheet_8.pdf [file Data_Sheet_8.pdf]

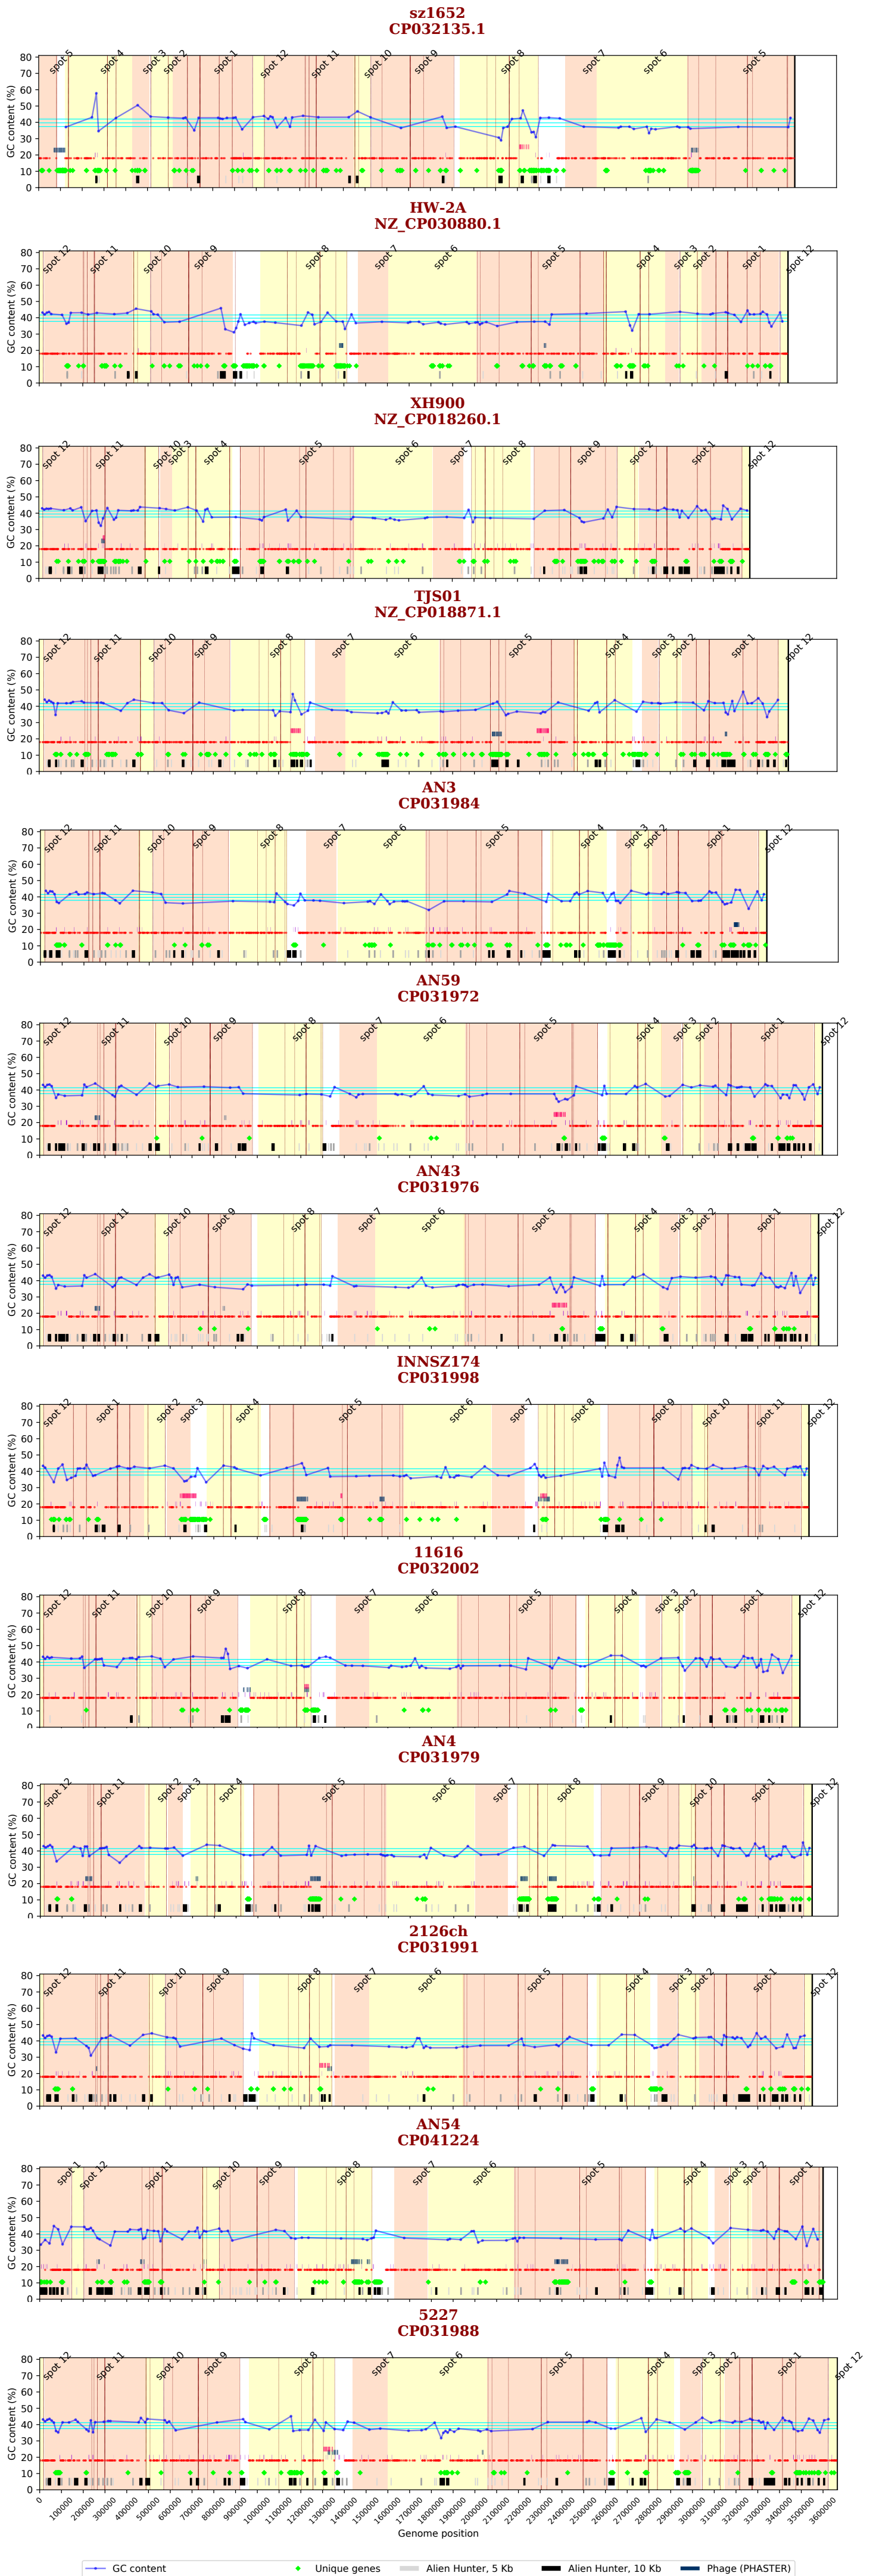

**Supplementary Figure 8. HGT features on representative genomes.**

Spots are regions with alternating orange and red colors; hypervariable regions are shown in white. Chromosomes are drawn to scale to highlight size differences, but the figures do not represent alignments.
