# Supplementary material for: Chromosome Architecture and Gene Content of the Emergent Pathogen Acinetobacter haemolyticus
Source: PubMed Central journal article supplement (PMC7326120; doi:10.3389/fmicb.2020.00926), 2020-05-25
Supplement: Data_Sheet_9.pdf [file Data_Sheet_9.pdf]

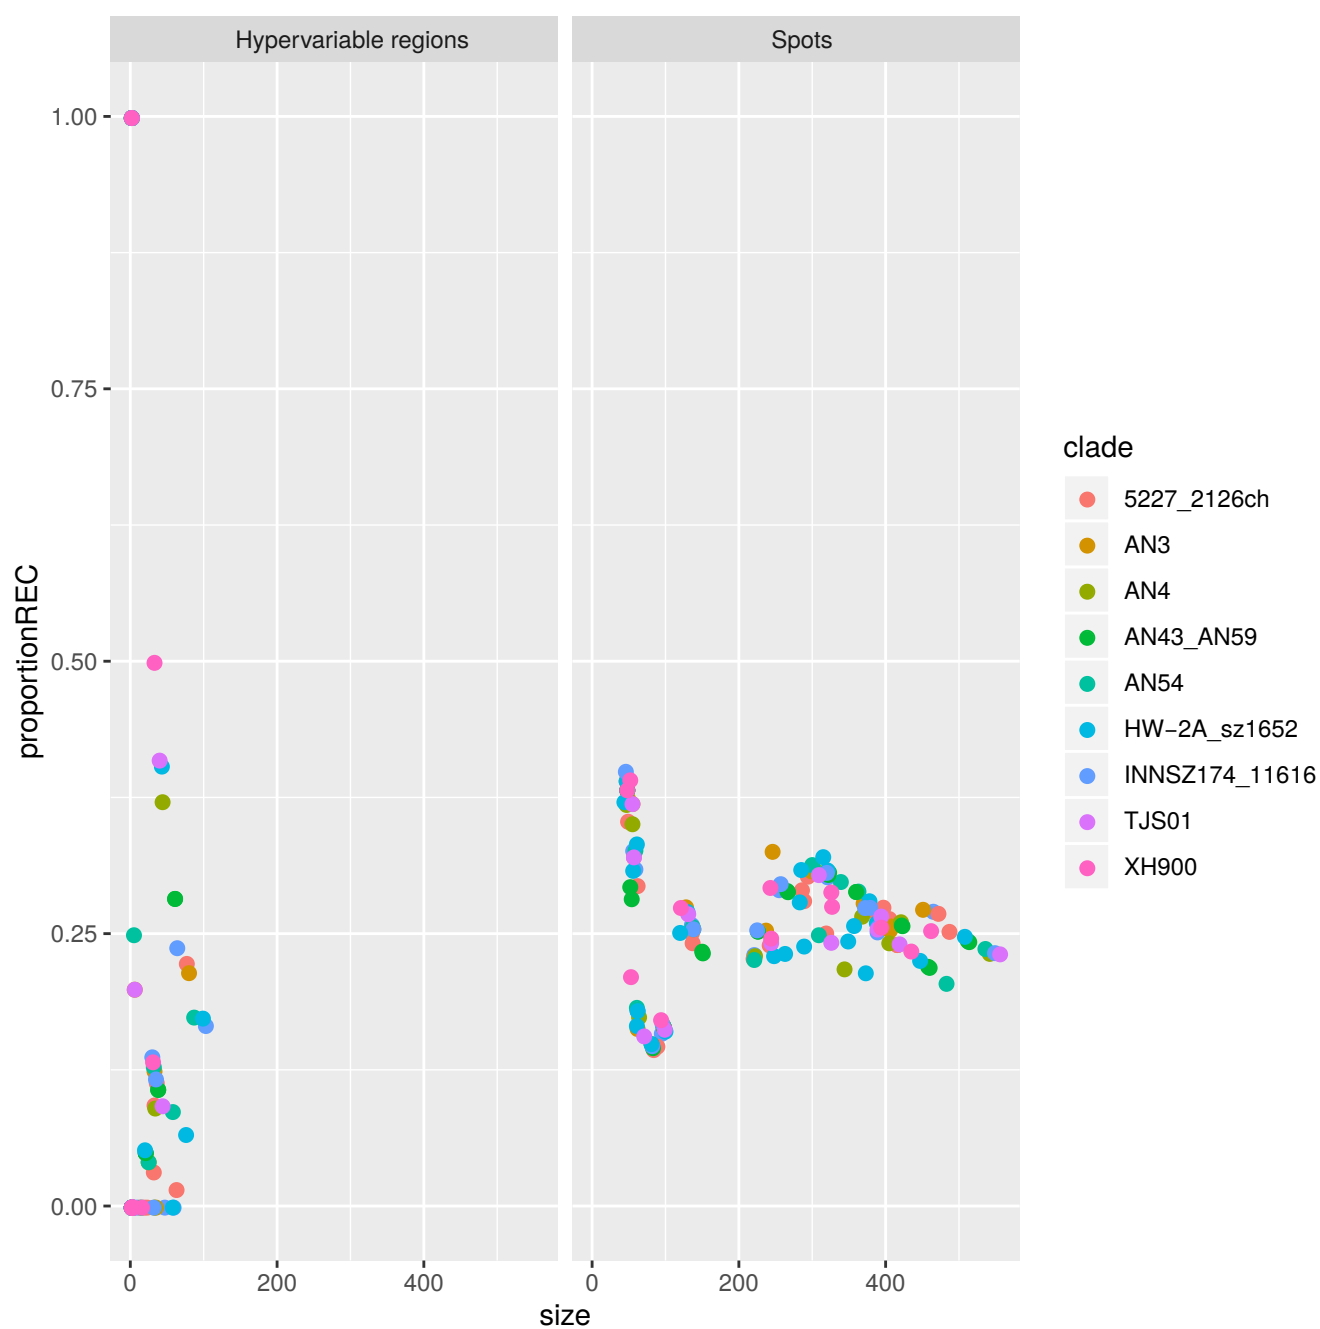

**Supplementary Figure 9. Scatterplot of the proportion of genes with recombination signal in spots and hypervariable regions**  
Color is given by clade.
